# Supplementary material
Source: PubMed Central journal article supplement (PMC3247939)
Supplement: supp_M111.254052_Table_S1_Version_20-4.pdf [file supp_M111.254052_Table_S1_Version_20-4.pdf]

**Table S1. Biopsies and Myoblasts**

| Sample | Type   | Patient    | Tissue                 | Age | Sex | D4Z4 repeats | Reference  |
|--------|--------|------------|------------------------|-----|-----|--------------|------------|
| Na     | BIO    | NO1220     | paravertebral          | 16  | M   | ND           | This study |
| Nb     | BIO    | NO44       | quadriceps             | 29  | M   | ND           | this study |
| Nc     | BIO    | #C1        | quadriceps             | 39  | M   | ND           | [1]        |
| Nd     | BIO    | #C3        | quadriceps             | 24  | M   | ND           | [1]        |
| Ne     | BIO    | #C4        | quadriceps             | 35  | M   | ND           | [1]        |
| Fa     | BIO    | DLapFSHD   | biceps                 | 53  | M   | 9            | this study |
| Fb     | BIO    | FSHD10     | trapezius              | 31  | M   | 5            | this study |
| Fc     | BIO    | FSHD 5734  | trapezius              | 31  | M   | 5            | this study |
| Fd     | BIO    | FSHD 22646 | semi-spinalis cervicis | 31  | F   | 3            | this study |
| Fe     | BIO    | #F1        | quadriceps             | 43  | F   | 8            | [1]        |
| Ff     | BIO    | #F2        | quadriceps             | 21  | F   | 8            | [1]        |
| Fg     | BIO    | #F3        | quadriceps             | 38  | M   | 7            | [1]        |
| Fh     | BIO    | #F4        | quadriceps             | 39  | F   | 7            | [1]        |
| Fi     | BIO    | #F8        | quadriceps             | 51  | F   | 5            | [1]        |
| Fj     | BIO    | #F9        | quadriceps             | 51  | M   | 5            | [1]        |
| Fk     | BIO    | #F10       | quadriceps             | 53  | F   | 5/7          | [1]        |
| N1     | MB, MT | NO46       | quadriceps             | 31  | M   | ND           | this study |
| N2     | MB, MT | NO44       | quadriceps             | 29  | M   | ND           | this study |
| N3     | MB, MT | NO40       | quadriceps             | 46  | M   | ND           | this study |
| N4     | MB, MT | NO47       | quadriceps             | 43  | M   | ND           | this study |
| N5     | MB, MT | NO42       | quadriceps             | 24  | F   | ND           | this study |
| N6     | MT     | #C3        | quadriceps             | 24  | M   | ND           | [1]        |
| N7     | MT     | #C4        | quadriceps             | 35  | M   | ND           | [1]        |
| F1     | MB, MT | FSHD10     | trapezius              | 31  | M   | 5            | this study |
| F2     | MB, MT | MO44       | pyramidal              | 54  | F   | 5/7          | this study |
| F3     | MB, MT | MO47       | quadriceps             | 38  | F   | 7            | this study |
| F4     | MB, MT | MO54       | quadriceps             | 25  | M   | 4            | this study |
| F5     | MB     | MO43       | infra-spinatus         | 41  | M   | FSHD-like    | this study |
| F6     | MB     | MO37       | quadriceps             | 42  | F   | 8            | this study |
| F7     | MT     | #F1        | quadriceps             | 43  | F   | 8            | [1]        |
| F8     | MT     | #F3        | quadriceps             | 38  | M   | 7            | [1]        |
| F9     | MT     | #F2        | quadriceps             | 21  | F   | 8            | [1]        |
| F10    | MT     | #F7        | trapezius              | 31  | M   | 5            | [1]        |

BIO: muscle biopsies; MB: Myoblasts; MT: Myotubes; ND: non-determined number of D4Z4 repeats.

1. Ansseau, E., et al., *DUX4c is up-regulated in FSHD. It induces the MYF5 protein and human myoblast proliferation*. PLoS One, 2009. 4(10): p. e7482.
