# Supplementary material
Source: PubMed Central journal article supplement (PMC3247939)

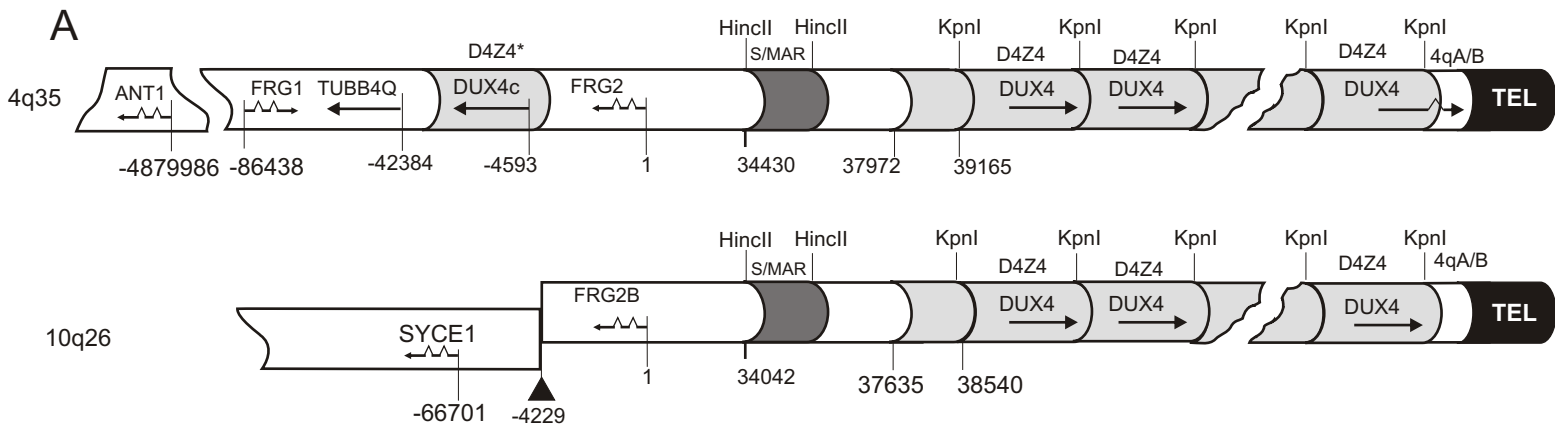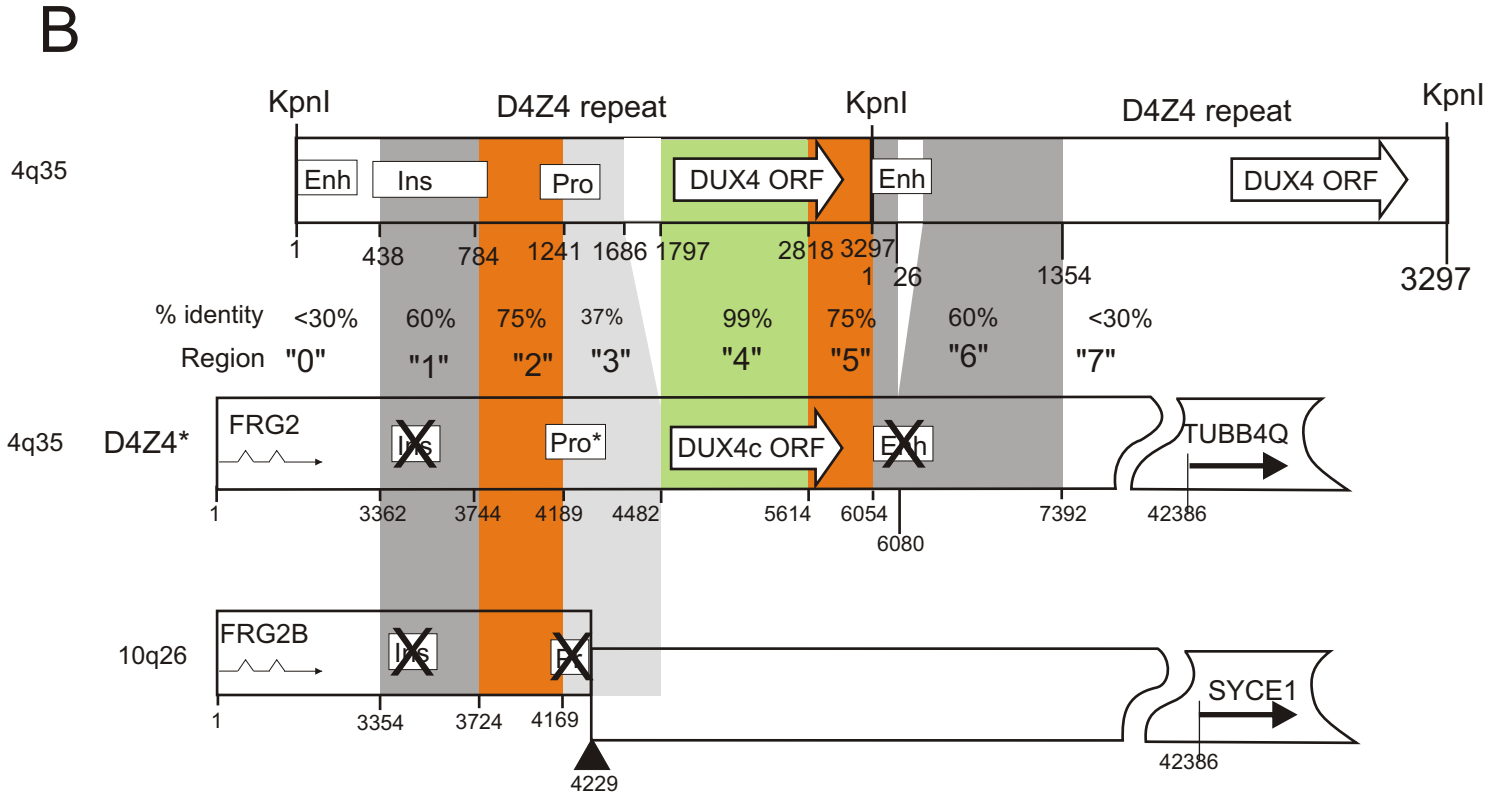

Figure S1

Supplement: supp_M111.254052_Figure_S1_version_20-4.pdf [file supp_M111.254052_Figure_S1_version_20-4.pdf]

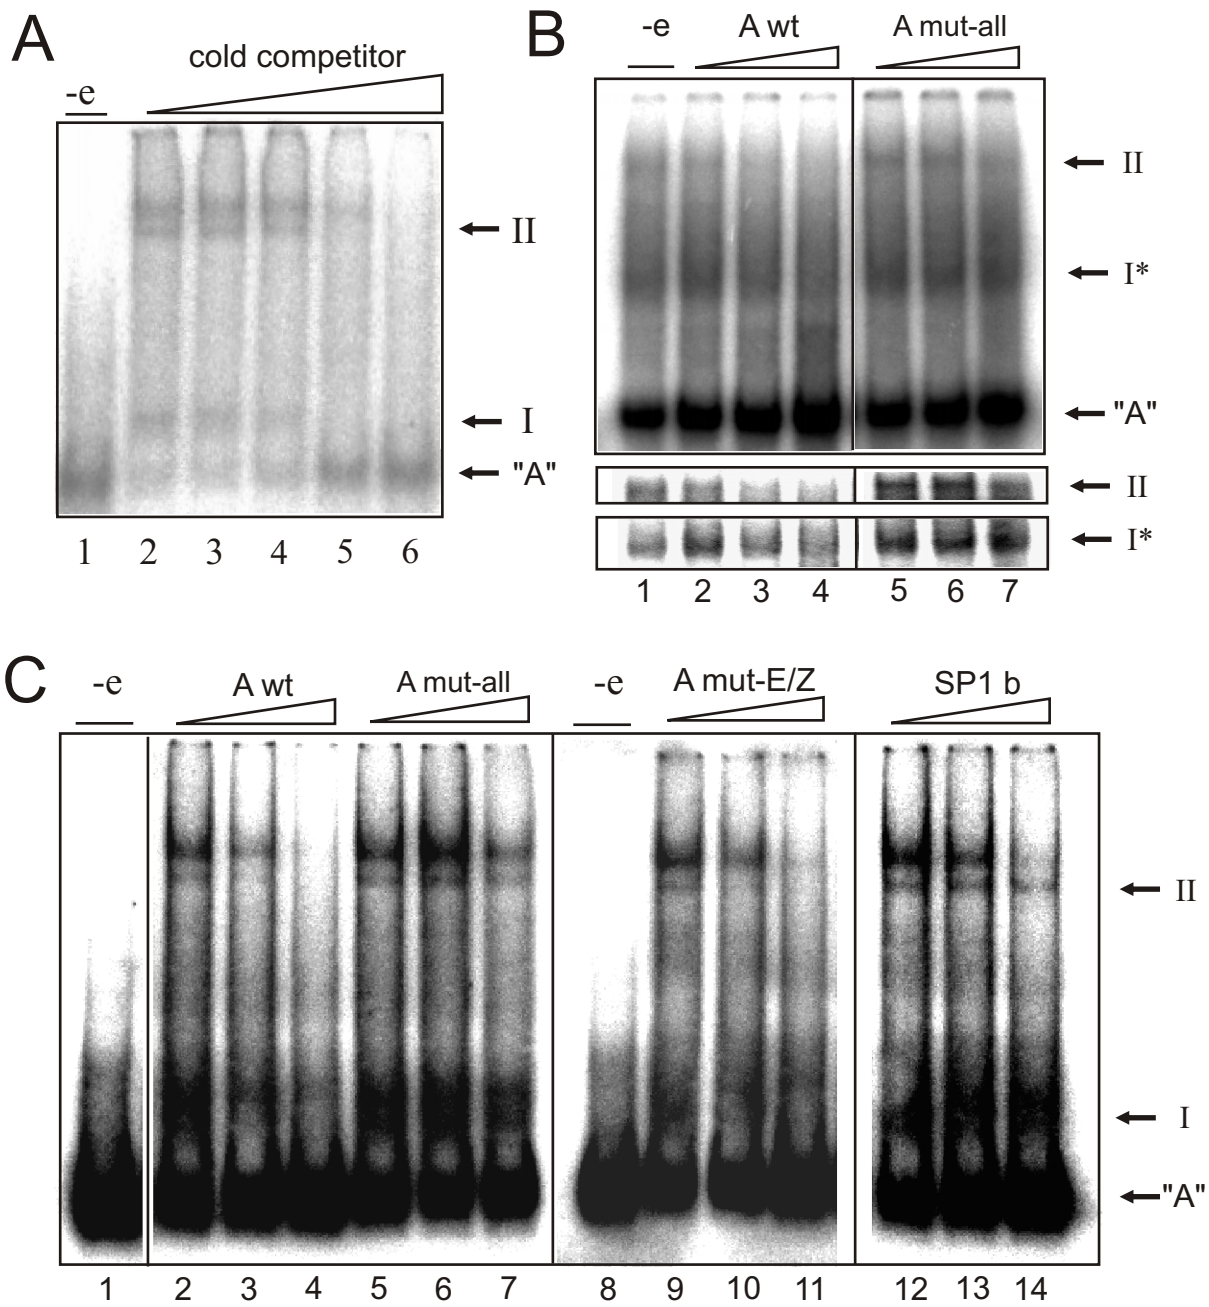

Figure S2

Supplement: supp_M111.254052_Figure_S2_version_20-4.pdf [file supp_M111.254052_Figure_S2_version_20-4.pdf]

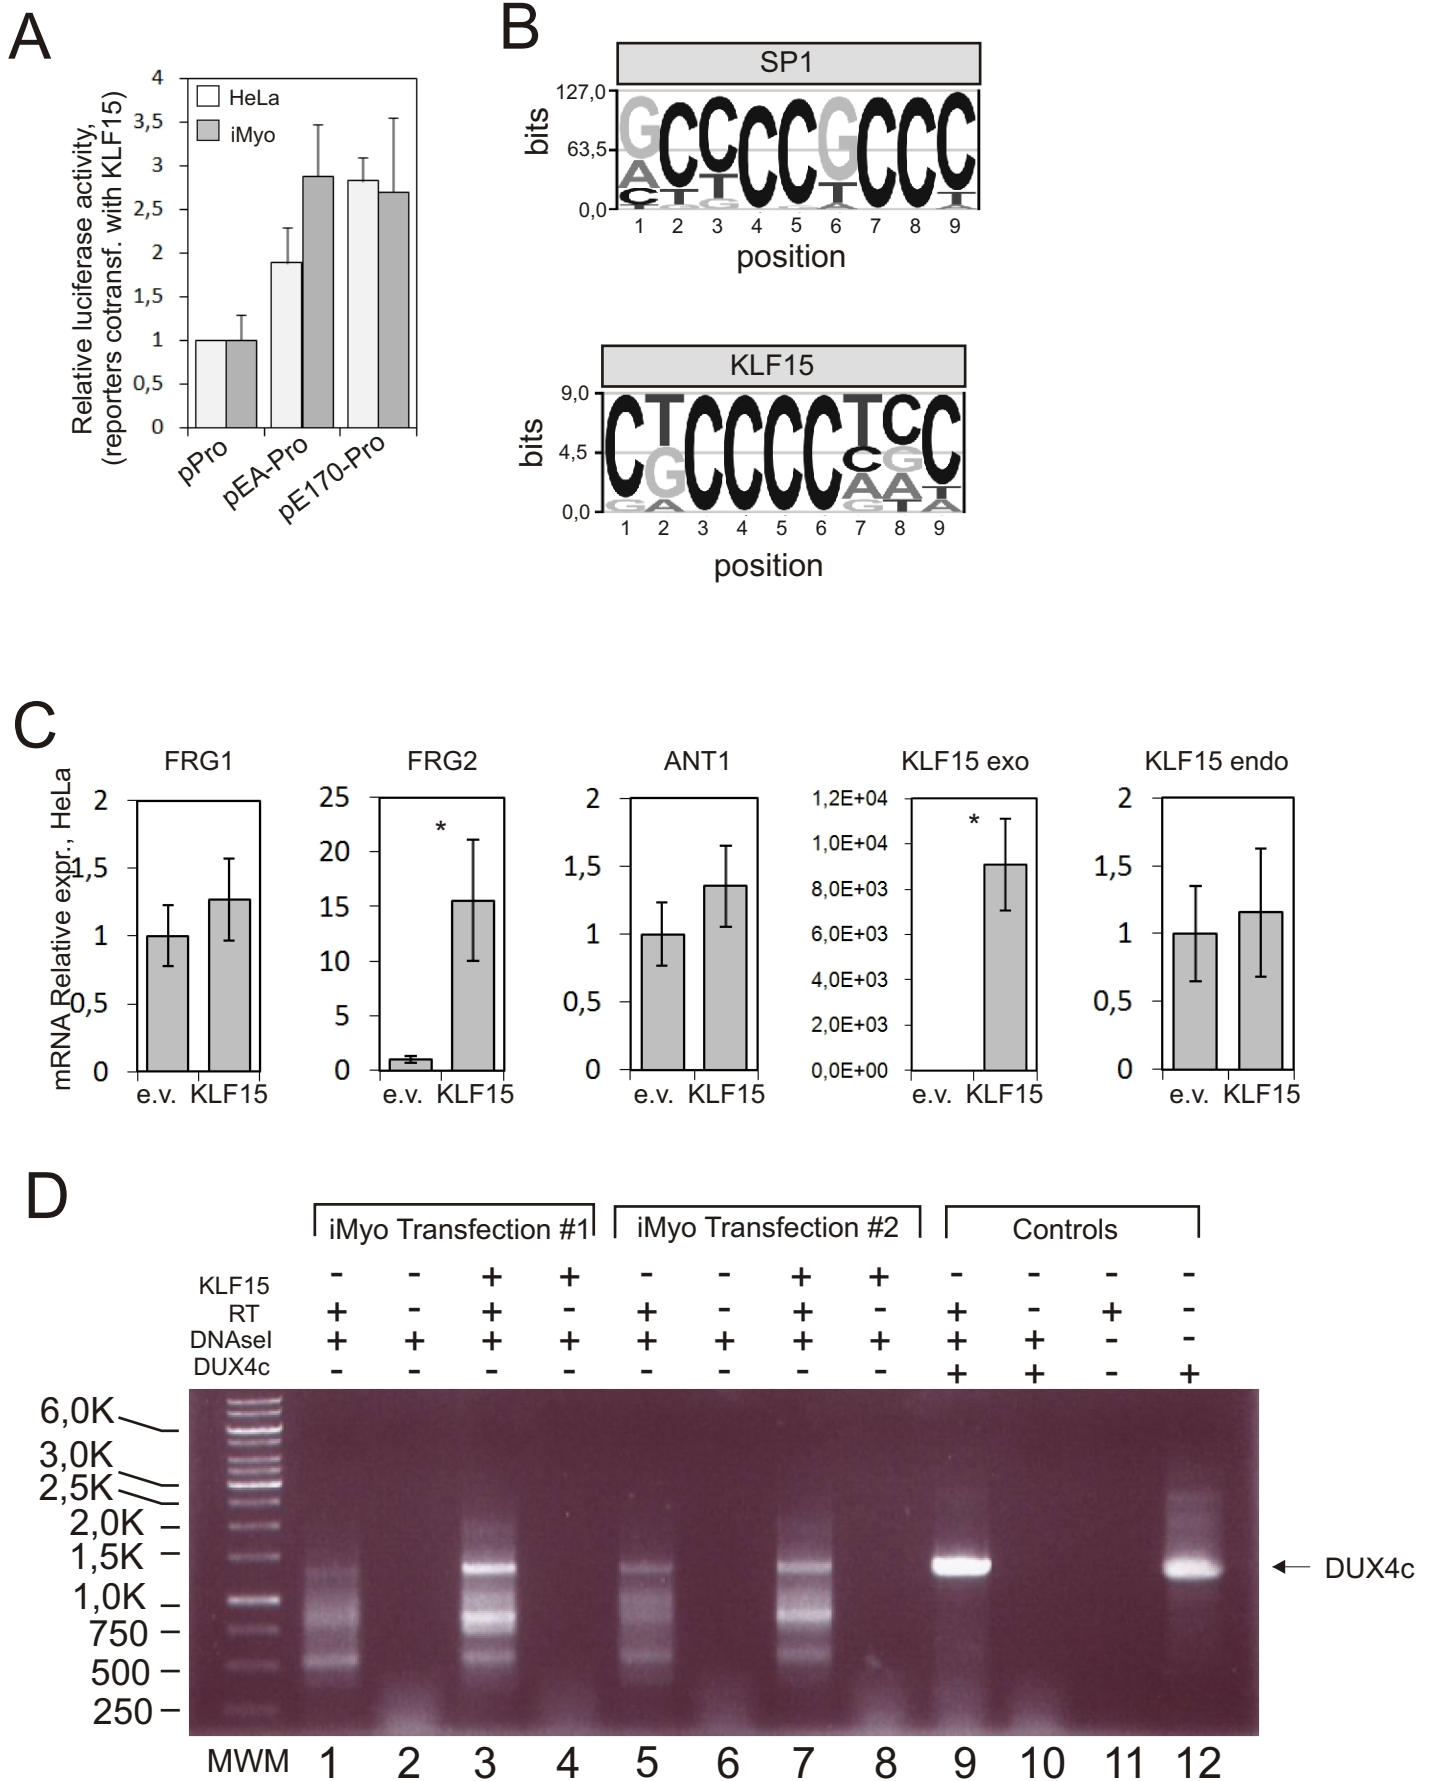

Supplement: supp_M111.254052_Figure_S3_version_20-4.pdf [file supp_M111.254052_Figure_S3_version_20-4.pdf]
